# Supplementary material for: A facile preparation of mullite [Al2(Al2.8Si1.2)O9.6] nanowires by B2O3-doped molten salts synthesis
Source: Royal Society of Chemistry journal article supplement (doi:10.1039/b927556h), 2010-01-01
Supplement: b927556h.pdf [file b927556h.pdf]

**Supplementary figures:**

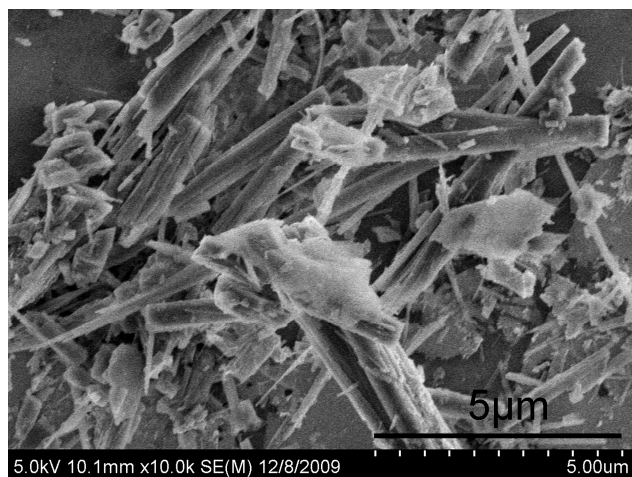

**Fig. 1S** SEM image of mullite obtained in the absence of  $B_2O_3$ .

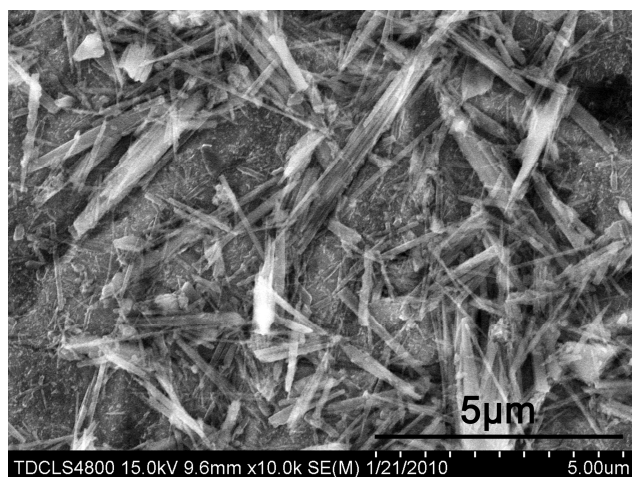

**Fig. 2S** SEM image of mullite obtained when the the molar ratio of  $B_2O_3/SiO_2$  was 0.05: 6.

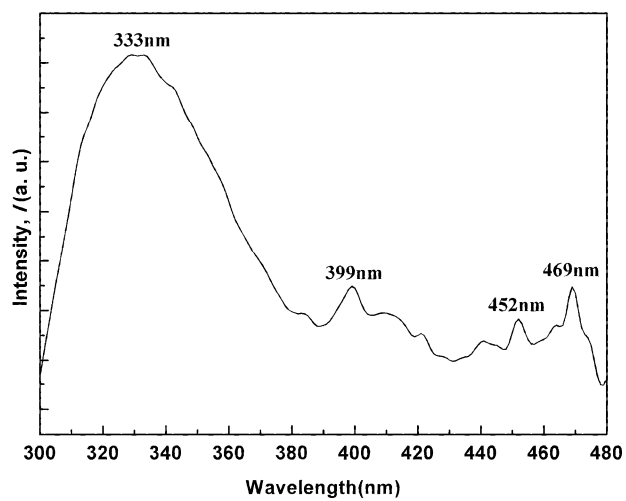

**Fig. 3S** Photoluminescence spectrum of as-synthesized mullite nanowires.
